# Supplementary material
Source: PubMed Central journal article supplement (PMC3511088)
Supplement: 1210993109_pnas.201210993SI.pdf [file 1210993109_pnas.201210993SI.pdf]

# Supporting Information

Meyer et al. 10.1073/pnas.1210993109

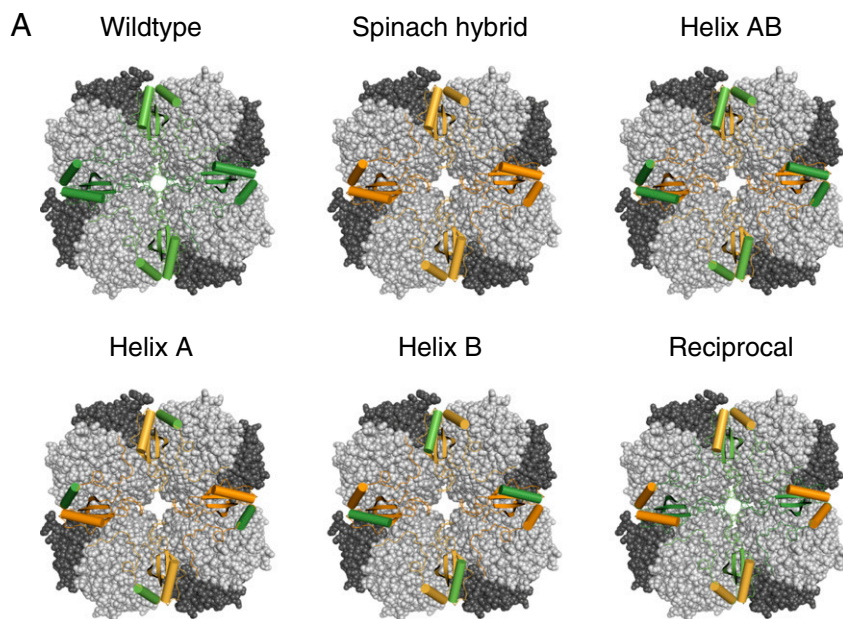

**B**

**Helix A RbcS sequence**

ATGATGGTGTGGCCACCCAGAACATGAAGCGCTACGAGACCCTGTCCTACCTGCCCCCTGACCGACGAGCAGATCGCCGC  
CCAGTTCGACTACATCGTCGCCAACAGTGGGTGCCCTGCCTGGAGTTCGAGACCGACCACGGCTTCGTGTACCCGAGCACC  
 ACAACTCCCCCGGCTACTACGACGGCCGCTACTGGACCATGTGGAAGCTGCCCATGTTGGGTGCACCGACCCCGCCAGGTG  
CTGAACGAGCTGGAGGAGTGCAAGAAGGAGTACCCCAACGCCTTCATCCGCATCATCGCTTCGACTCCAACCGCCAGGTGCA  
 GTGCGTGTCTTCATCGCCTACAAGCCCGCGGCTACTAA

**Helix B RbcS sequence**

ATGATGGTGTGGCCACCCAGAACATGAAGCGCTACGAGACCCTGTCCTACCTGCCCCCTGACCCCGACCAGCTGGCCCG  
CCAGTGGACTACCTGCTGAACAACAAGTGGGTGCCCTGCCTGGAGTTCGAGACCGACCACGGCTTCGTGTACCCGAGCACC  
 ACAACTCCCCCGGCTACTACGACGGCCGCTACTGGACCATGTGGAAGCTGCCCATGTTGGGTGCACCGACCCCATGCAGGTG  
CTGCGCAGATCGTCGCTGCACCAAGGCCTACCCCAACGCCTTCATCCGCATCATCGCTTCGACTCCAACCGCCAGGTGCA  
 GTGCGTGTCTTCATCGCCTACAAGCCCGCGGCTACTAA

**Helix AB RbcS sequence**

ATGATGGTGTGGCCACCCAGAACATGAAGCGCTACGAGACCCTGTCCTACCTGCCCCCTGACCGACGAGCAGATCGCCGC  
CCAGTTCGACTACATCGTCGCCAACAGTGGGTGCCCTGCCTGGAGTTCGAGACCGACCACGGCTTCGTGTACCCGAGCACC  
 ACAACTCCCCCGGCTACTACGACGGCCGCTACTGGACCATGTGGAAGCTGCCCATGTTGGGTGCACCGACCCCATGCAGGTG  
CTGCGCAGATCGTCGCTGCACCAAGGCCTACCCCAACGCCTTCATCCGCATCATCGCTTCGACTCCAACCGCCAGGTGCA  
 GTGCGTGTCTTCATCGCCTACAAGCCCGCGGCTACTAA

**Reciprocal RbcS sequence**

ATGATGGTCTGGACCCCGGTCAACAACAAGATGTTCCGAGACCTTCTCCTACCTGCCTCTGACCCCGACCAGCTGGCCCG  
CCAGTGGACTACCTGCTGAACAACGGCTGGATCCCTGCCTGGAGTTCGCTGAGGCCGACAAGGCCTACGTGTCCAACGAGT  
 CGGCCATCCGCTTCGGCAGCGTGTCTTGCCTGTACTACGACAACCGCTACTGGACCATGTGGAAGCTGCCCATGTTGGGTGC  
 CCGACCCCCCGCAGGTGCTGAACGAGCTGGAGGAGTGCAAGAAGGAGTTCCCGATGCCATCGTGCCTGCTGGCTTCGA  
 CAACCCAGAAGCAGGTGCAGATCATGGCTTCTGGTCCAGCGCCCAAGATGCCCGGACTTCCAGCCCGCCAAACAGCCCT  
 CCGTGTA

**Fig. S1.** (A) Cartoon representation of all of the Rubisco variants used in this work. The hexadecameric holoenzyme is viewed from the “top,” through the axis of the solvent channel. Rubisco large subunit dimers are in gray. Small subunits encoded by algal (*Chlamydomonas*) sequence are in green. Small subunits encoded by higher plant (spinach) sequence are in orange. The four mutants generated in this work (helix A, helix B, helix AB, and reciprocal) have a chimeric small subunit combining algal (green) and higher plant (orange) elements. The two small subunit  $\alpha$ -helices are represented by barrels. (B) Codon-optimized coding sequences for the mature small subunits of chimeric variants of the spinach and *Chlamydomonas* Rubisco. These sequences were used to exactly replace the *Chlamydomonas* RbcS1 mature-protein coding sequence of pS51-ITP (1) to generate plasmids used to transform a *Chlamydomonas* RbcS null mutant (2).  $\alpha$ -Helix sequences are underlined.

1. Genkov T, Meyer M, Griffiths H, Spreitzer RJ (2010) Functional hybrid rubisco enzymes with plant small subunits and algal large subunits: Engineered rbcS cDNA for expression in *Chlamydomonas*. *J Biol Chem* 285(26):19833–19841.
2. Khrebtukova I, Spreitzer RJ (1996) Elimination of the *Chlamydomonas* gene family that encodes the small subunit of ribulose-1,5-bisphosphate carboxylase/oxygenase. *Proc Natl Acad Sci USA* 93(24):13689–13693.

Wildtype  
Spinach hybrid  
Reciprocal  
Helix AB

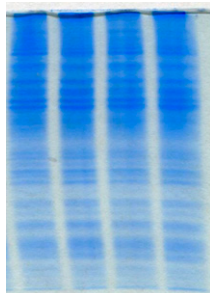

Fig. S2. Coomassie blue-stained gel corresponding to Western blot in Fig. 2B.

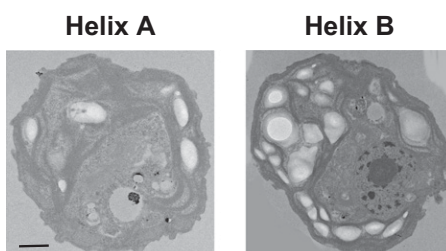

Fig. S3. Representative electron micrographs of the Rubisco SSU single  $\alpha$ -helix mutants helix A and helix B. Both mutants systematically lacked a pyrenoid. (Scale bar, 0.5  $\mu\text{m}$ .)

Spinach hybrid

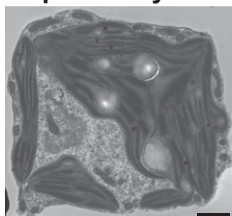

Reciprocal

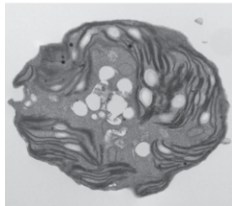

Fig. S4. Representative electron micrographs of pyrenoidless spinach hybrid (*Upper*) and reciprocal (*Lower*), displaying a marked phenotype of thylakoid membrane hyperstacking. (Scale bar, 1  $\mu\text{m}$ .)
